# Supplementary material for: Fast and on-site animal species identification in processed meat via centrifugal microfluidics and isothermal amplification
Source: Royal Society of Chemistry journal article supplement (doi:10.1039/d3lc01103h), 2024-01-01
Supplement: d3lc01103h1.pdf [file d3lc01103h1.pdf]

## Lab on a Chip

### Electronic Supplementary Information (ESI)

## Fast and on-site animal species identification in processed meat via centrifugal microfluidics and isothermal amplification

Laura Niebling,<sup>\*a</sup> Ramona Nitzsche,<sup>c</sup> Thorben Sieksmeyer,<sup>c</sup> Vera Haskamp,<sup>c</sup> Jonas Kissenkötter,<sup>c</sup> Ahmed Abd El Wahed,<sup>d</sup> Thomas Teufel,<sup>e</sup> Herbert Hermann,<sup>f</sup> Nils Paust<sup>ab</sup> and Ana R. Homann<sup>\*a</sup>

### S1: Preparation of sausages.

Raw fermented sausages (Salami) were prepared either with 50 % frozen and 30 % fresh pork meat (90/10), and 20 % frozen pork fatback (5/95) or with 50 % frozen and 30 % fresh lean beef (95/5), and 20 % frozen beef fat (5/95). Curing salt with 0.5 % sodium nitrite, spice mix "Haussalami Rohwurst Reifekombination CL" (Pacovis, Stetten, Switzerland), and starter culture VBY-81 (SACCO, Cadorago, Italy) were added to the minced meat at 2.8 %, 0.85 %, and 0.02 % respectively. Sausages were processed in a smoking chamber until 30 % drying was reached. The pH value of final salamis was approximately five. Salamis were stored refrigerated at 4 °C for up to two weeks, and then stored frozen.

Cooked sausages (Lyoner) were prepared with 40 % pork meat (S II), 20 % pork belly (S V), 10 % pork cheeks (S VI), 10 % pork fatback (S VIII), 20 % drinking water ice, 1.8 % curing salt, 0.3 % sodium-di-phosphate, 0.6 % spices "Lyoner Gewürz" (Frutarom, Salzburg, Austria). Sausages were filled into sterile casings at calibre 60 mm and cooked at 50 °C for one hour and at 78 °C until 72 °C core temperature was reached. The sausages were cooled at 4 °C for five days, and then stored frozen.

Fine liver sausage was prepared according to the following recipe: 20 % lean pork shoulder (S III), 55 % pork belly (S X) with approximately 50 % fat, 20 % pork liver, and 5 % cooking stock, 1.7 % curing salt (0.5-0.6 %), 0.6 % spice mix "Kalbsleberwurst Moreno Perle" (Frutarom, Salzburg, Austria), 0.3 % dextrose, 0.20 % onion powder, and 0.05 % sodium ascorbate. Pork meat was cooked to 68-70 °C core temperature, minced and mixed with pork liver in a prewarmed cutter (45 %). The meat batter was filled into casings, cooked at 76 °C until 72 °C core temperature was reached, and then cooled at 4 °C for five days. Afterwards, sausages were stored frozen.

### S2: Sequences of the developed primer.

Table 1: Sequences of the developed primers to detect the six animal species pork, horse, turkey, sheep, chicken and beef.

| Species | Primer  | 5'→3'                                          |
|---------|---------|------------------------------------------------|
| Pork    | forward | CTACCCTTATCATAACAGTAATGTCCGGAACCAT             |
|         | reverse | TGTGGCTGCTTCTGTGGCTCGTG                        |
| Horse   | forward | CTGCCCTTGAGAATCAAAATGAACGAAAATC                |
|         | reverse | CTAGCCATTGTTGAATTGAGATTAGGCGATTGT              |
| Chicken | forward | ATCCTAGCCTTCTCATCCATCTCCCATTTA                 |
|         | reverse | GGTTTTAGTTCATGAGATGAGTAGTGTGACAGT              |
| Turkey  | forward | CACCTTTCATTGTATTCACTAATAACAACAAC               |
|         | reverse | GGCCGGCTAGAGATAGGAGTGCAAGTATTATAG              |
| Beef    | forward | TAA TAC CTA TTA TCC TAC TAG TCT TCG CAG CC     |
|         | reverse | ATT GGA GTA AGT TGA GGT TTT GTA CAT AAT CAG TA |
| Sheep   | forward | CAC AAT AAT ATT CAT CCA CAC AGG ACA            |
|         | reverse | GAT CAT GTA ACG AAT AGT GCT ACT GGA ACG        |

### S3: Analysis of sausage samples using a RT-PCR.

As a reference method, the produced sausage samples were tested for animal species using commercially available RT-PCR kits (SureFood® Animal ID series, R-Biopharm AG, Germany). DNA extraction was performed manually using the SureFood® PREP Basic

Kit (R-Biopharm AG, Germany). The limit of detection for the RT-PCR is specified as 0.5 % for pork and 0.1 % for horse, turkey, sheep, chicken and beef. Pork and beef salami as well as cooked pork sausage and liver sausage containing 0 %, 0.1 % and 1 % of horse, pork, turkey, sheep, chicken and beef meat each were analysed. RT-PCR reactions were set up and run according to the manufacturer (SureFood®Animal ID series, R-Biopharm AG, Germany) in duplicates from two separate DNA extractions on a RT-PCR-Cycler (CFX96, Bio-Rad Laboratories GmbH, Feldkirchen, Germany). Signals were evaluated using Bio-Rad CFX Maestro 1.1 (version 4.1.2433.1219, Bio-Rad Laboratories GmbH, Germany) software with “Cq Determination mode” set to “Single Threshold”, and “Baseline Setting” set to “Baseline Subtracted Curve Fit”. The results of the RT-PCR are shown in Table 1. Regarding pure pork and beef sausages, pork and beef could be detected consistently whereas all other animal species were not detected as expected. 1 % of foreign meat could be detected for all analysed animal species and in all sausages. 0.1 % of horse, pork, turkey and chicken could be detected in all sausages whereas 0.1 % of sheep could only be detected reproducibly in cooked pork sausage. 0.1 % of beef could not be detected in any pork sausage except in one replicate of the cooked pork sausage.

Table 2: Results of the RT-PCR (SureFood®Animal ID, R-Biopharm AG, Germany) following a manual DNA extraction using the SureFood®PREP Basic Kit (R-Biopharm AG, Germany). All runs were carried out in duplicates using samples from pork salami, cooked pork sausage, pork liver sausage and beef salami containing 0 %, 0.1 % and 1 % of horse, pork, turkey, sheep, chicken and beef meat each.

| Sausage type        | Amount of each foreign animal species [%] | Animal species detected |      |         |        |       |       |
|---------------------|-------------------------------------------|-------------------------|------|---------|--------|-------|-------|
|                     |                                           | pork                    | beef | chicken | turkey | horse | sheep |
| Pork salami         | 0                                         | 2/2                     | 0/2  | 0/2     | 0/2    | 0/2   | 0/2   |
|                     | 0.1                                       |                         | 0/2  | 2/2     | 2/2    | 2/2   | 0/2   |
|                     | 1                                         |                         | 2/2  | 2/2     | 2/2    | 2/2   | 2/2   |
| Beef salami         | 0                                         | 0/2                     | 2/2  | 0/2     | 0/2    | 0/2   | 0/2   |
|                     | 0.1                                       | 2/2                     |      | 2/2     | 2/2    | 2/2   | 0/2   |
|                     | 1                                         | 2/2                     |      | 2/2     | 2/2    | 2/2   | 2/2   |
| Cooked pork sausage | 0                                         | 2/2                     | 0/2  | 0/2     | 0/2    | 0/2   | 0/2   |
|                     | 0.1                                       |                         | 1/2  | 2/2     | 2/2    | 2/2   | 2/2   |
|                     | 1                                         |                         | 2/2  | 2/2     | 2/2    | 2/2   | 2/2   |
| Pork liver sausage  | 0                                         | 2/2                     | 0/2  | 0/2     | 0/2    | 0/2   | 0/2   |
|                     | 0.1                                       |                         | 0/2  | 2/2     | 2/2    | 2/2   | 1/2   |
|                     | 1                                         |                         | 2/2  | 2/2     | 2/2    | 2/2   | 2/2   |
